# Supplementary material
Source: Copernicus journal article supplement (doi:10.5194/bg-23-4719-2026)
Supplement: Supplementary file 1 [file bg-23-4719-2026-supplement.pdf]

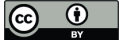

*Supplement of*

## **A potential explanation for the anomalously low nitrate to phosphate ratio in the well-oxygenated East/Japan Sea**

**Hyo-Ryeon Kim et al.**

*Correspondence to:* Il-Nam Kim ([ilnamkim@inu.ac.kr](mailto:ilnamkim@inu.ac.kr))

The copyright of individual parts of the supplement might differ from the article licence.

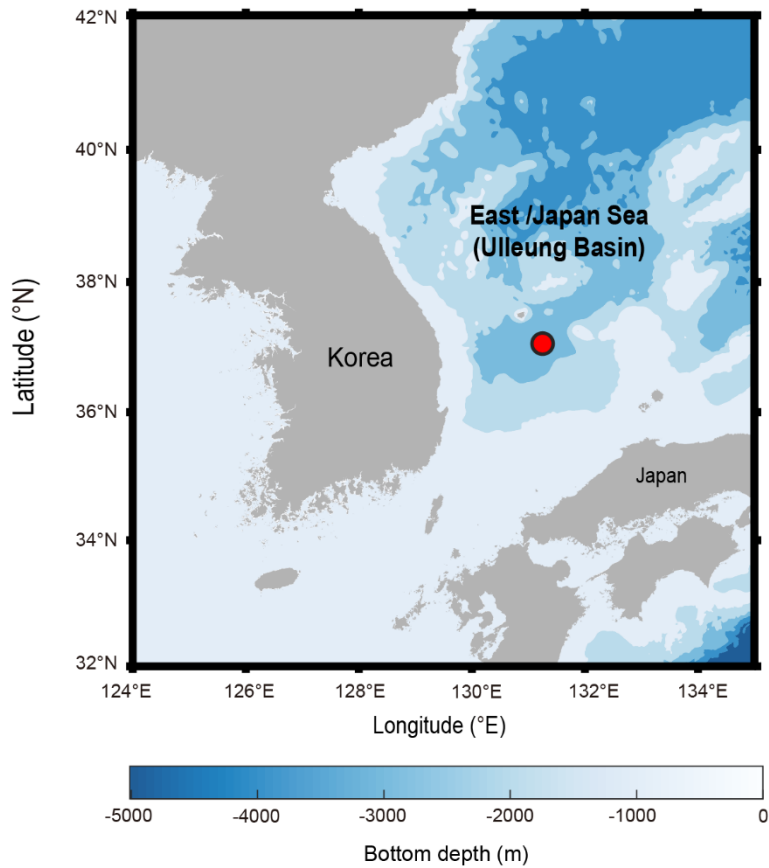

29

30 **Figure S1. Map of the sampling station in the Ulleung Basin, East/Japan Sea (EJS).**

31 Geographic location of the sampling site in the Ulleung Basin (UB), southwestern East/Japan  
32 Sea (EJS). The sampling station (37.056°N, 131.251°E), marked by a red circle with a black  
33 edge, is located in the central part of the UB—a deep semi-enclosed subregion of the ES.

34

35

36

37

38

39

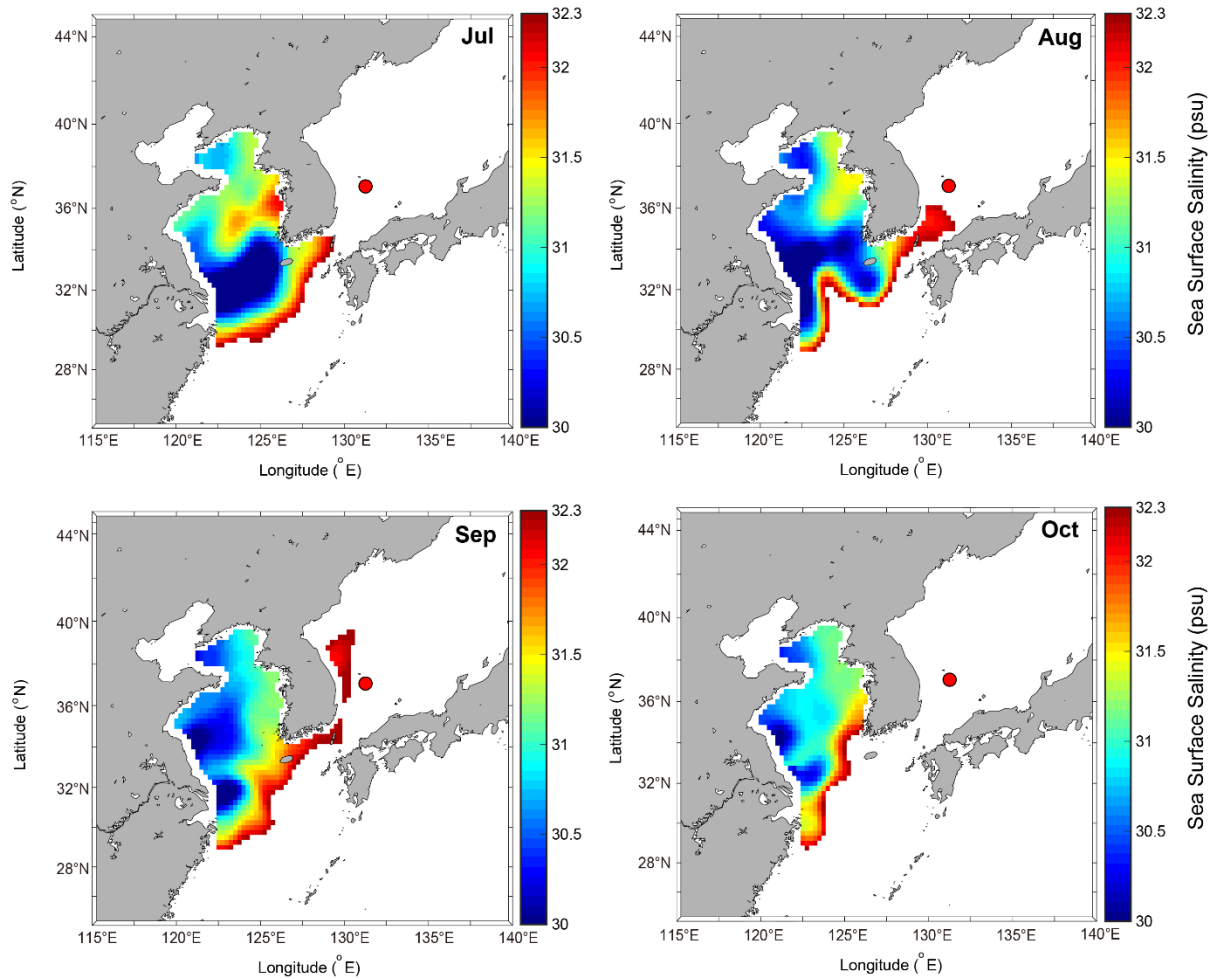

40

41 **Figure S2. Satellite-based detection of seasonal Changjiang Diluted Water inflow to the**

42 **East/Japan Sea (EJS).** Seasonal distribution of Changjiang Diluted Water (CDW) inferred

43 from satellite-derived sea surface salinity (SSS) data during July–October 2021. Monthly SSS

44 values for the surface layer were obtained from the NASA Ocean Salinity project and

45 visualized using a fixed color scale of 30–32.3 psu. Sampling stations are marked by red circles.

46 Data were derived from Aquarius, SMAP (RSS V5.0), and SMOS MIRAS sensors and

47 provided as Level-4 gridded products with a spatial resolution of 0.25° (~40 km). This figure

48 highlights the seasonal inflow of Yangtze River freshwater, identified as a major source of

49 phosphorus to the surface layer.

50

51

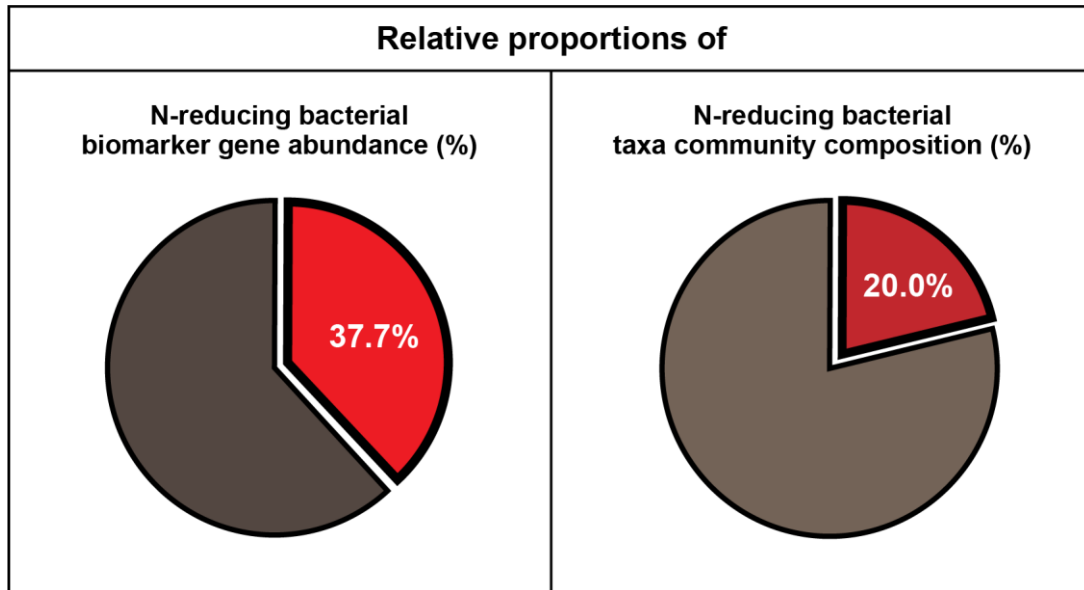

52

53 **Figure S3. Proportional composition of N-reducing bacterial biomarker genes and taxa**  
 54 **integrated across all depths and sampling months.** Proportion composition of nitrogen (N)-  
 55 reducing genes and associated bacterial taxa across five depths (0–1000m) during the sampling  
 56 period (February, April, June, August, and October). The left panel shows the relative  
 57 abundance of genes involved in nitrate reduction (*nap* and *nar*) and denitrification (*nap*, *nar*,  
 58 *nir*, *nor*, and *nos*), calculated as a percentage of total N-transformation genes. The right panel  
 59 illustrates the composition of bacterial communities predicted to perform these N-reducing  
 60 functions. Proportions were computed by dividing the abundance of N-reducing genes (or  
 61 bacterial taxa) by the total abundance of all N-transformation genes (or the entire bacterial  
 62 community), then multiplying by 100. Corresponding depth- and month-specific profiles for  
 63 each gene and taxon are shown in Fig. 3 and Fig. 4.

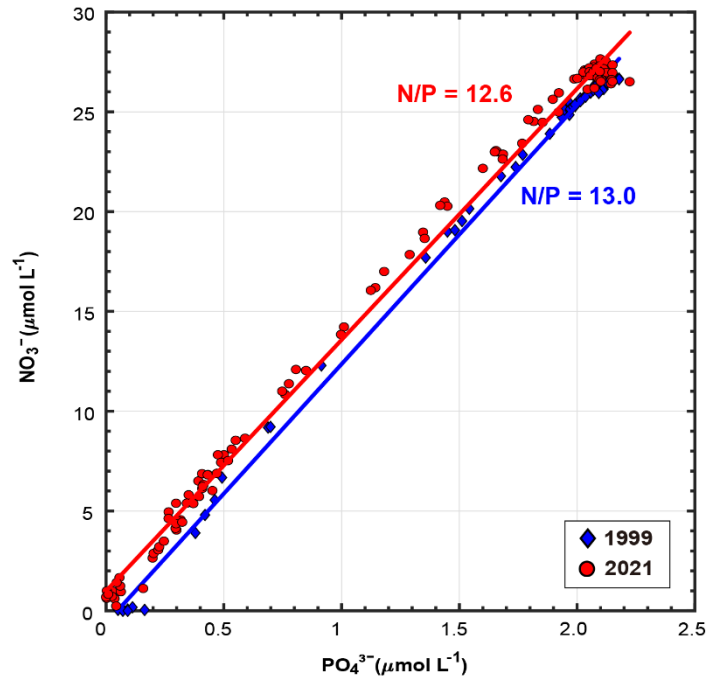

64

65 **Figure S4. Decadal shift in N:P stoichiometry near the East/Japan Sea (EJS) study site.**

66 Nitrate-to-phosphate ( $\text{NO}_3^-:\text{PO}_4^{3-}$ ) ratios at the 2021 sampling station (red circle) and three

67 nearby stations from the 1999 CREAMS survey (blue diamonds; Station 1: 37.05°N, 130.93°E;

68 Station 2: 37.41°N, 131.41°E; Station 3: 37.05°N, 131.68°E). This figure compares local N:P

69 ratios between 1999 and 2021, capturing decadal changes in nutrient stoichiometry (Linear

70 regressions of  $\text{PO}_4^{3-}$  (x-axis) versus  $\text{NO}_3^-$  (y-axis) show strong correlations in both years, with

71  $R^2 = 0.95$  and  $p < 0.05$  for 1999, and  $R^2 = 0.92$  and  $p < 0.05$  for 2021).

72 **Table S1. Summary of N-transformation gene abundance across five depths and sampling months.**

| month | depth | <i>gdh2+ureC</i>      | <i>pmo-amo</i>        | <i>hao</i>            | <i>nxr</i>            | <i>nar+nap</i>        | <i>nir</i>            | <i>nor</i>            | <i>nos</i>            |
|-------|-------|-----------------------|-----------------------|-----------------------|-----------------------|-----------------------|-----------------------|-----------------------|-----------------------|
| Feb   | 0     | 1.81×10 <sup>-4</sup> | 3.15×10 <sup>-4</sup> | 7.48×10 <sup>-8</sup> | 6.50×10 <sup>-6</sup> | 1.18×10 <sup>-5</sup> | 3.74×10 <sup>-4</sup> | 7.56×10 <sup>-6</sup> | 1.90×10 <sup>-6</sup> |
|       | 150   | 3.33×10 <sup>-4</sup> | 4.07×10 <sup>-4</sup> | 5.33×10 <sup>-8</sup> | 1.33×10 <sup>-5</sup> | 2.50×10 <sup>-5</sup> | 4.86×10 <sup>-4</sup> | 1.93×10 <sup>-5</sup> | 4.01×10 <sup>-6</sup> |
|       | 300   | 2.60×10 <sup>-4</sup> | 2.77×10 <sup>-4</sup> | 2.33×10 <sup>-7</sup> | 2.55×10 <sup>-5</sup> | 5.18×10 <sup>-5</sup> | 3.41×10 <sup>-4</sup> | 2.14×10 <sup>-5</sup> | 5.62×10 <sup>-6</sup> |
|       | 750   | 1.66×10 <sup>-4</sup> | 6.85×10 <sup>-5</sup> | 8.78×10 <sup>-8</sup> | 3.22×10 <sup>-5</sup> | 7.54×10 <sup>-5</sup> | 1.01×10 <sup>-4</sup> | 2.27×10 <sup>-5</sup> | 9.71×10 <sup>-6</sup> |
|       | 1000  | 1.82×10 <sup>-4</sup> | 4.09×10 <sup>-5</sup> | 4.29×10 <sup>-8</sup> | 1.81×10 <sup>-5</sup> | 4.38×10 <sup>-5</sup> | 6.21×10 <sup>-5</sup> | 1.81×10 <sup>-5</sup> | 7.77×10 <sup>-6</sup> |
| Apr   | 0     | 3.64×10 <sup>-5</sup> | 2.99×10 <sup>-5</sup> | 0                     | 6.40×10 <sup>-6</sup> | 8.48×10 <sup>-6</sup> | 5.59×10 <sup>-5</sup> | 1.05×10 <sup>-5</sup> | 1.67×10 <sup>-6</sup> |
|       | 150   | 2.59×10 <sup>-4</sup> | 4.36×10 <sup>-4</sup> | 9.28×10 <sup>-9</sup> | 9.18×10 <sup>-6</sup> | 1.28×10 <sup>-5</sup> | 5.21×10 <sup>-4</sup> | 1.91×10 <sup>-5</sup> | 2.77×10 <sup>-6</sup> |
|       | 300   | 2.67×10 <sup>-4</sup> | 4.17×10 <sup>-4</sup> | 5.77×10 <sup>-8</sup> | 1.12E-05              | 2.13×10 <sup>-5</sup> | 4.98×10 <sup>-4</sup> | 1.65×10 <sup>-5</sup> | 3.08×10 <sup>-6</sup> |
|       | 750   | 2.12×10 <sup>-4</sup> | 7.96×10 <sup>-5</sup> | 1.53×10 <sup>-7</sup> | 2.20×10 <sup>-5</sup> | 5.81×10 <sup>-5</sup> | 1.21×10 <sup>-4</sup> | 2.17×10 <sup>-5</sup> | 8.81×10 <sup>-6</sup> |
|       | 1000  | 1.65×10 <sup>-4</sup> | 6.33×10 <sup>-5</sup> | 5.42×10 <sup>-8</sup> | 3.96×10 <sup>-5</sup> | 9.45×10 <sup>-5</sup> | 9.36×10 <sup>-5</sup> | 3.51×10 <sup>-5</sup> | 1.14×10 <sup>-5</sup> |
| Jun   | 0     | 1.36×10 <sup>-5</sup> | 1.24×10 <sup>-7</sup> | 2.30×10 <sup>-8</sup> | 4.4×10 <sup>-6</sup>  | 7.41E-06              | 7.64×10 <sup>-6</sup> | 6.93×10 <sup>-6</sup> | 1.18×10 <sup>-6</sup> |
|       | 150   | 2.86×10 <sup>-4</sup> | 4.80×10 <sup>-4</sup> | 6.20×10 <sup>-9</sup> | 1.02×10 <sup>-5</sup> | 1.45×10 <sup>-5</sup> | 5.76×10 <sup>-4</sup> | 2.97×10 <sup>-5</sup> | 3.43×10 <sup>-6</sup> |
|       | 300   | 2.80×10 <sup>-4</sup> | 3.46×10 <sup>-4</sup> | 6.24×10 <sup>-8</sup> | 3.08×10 <sup>-5</sup> | 5.05×10 <sup>-5</sup> | 4.29×10 <sup>-4</sup> | 3.18×10 <sup>-5</sup> | 4.04×10 <sup>-6</sup> |
|       | 750   | 1.58×10 <sup>-4</sup> | 1.73×10 <sup>-4</sup> | 4.09×10 <sup>-8</sup> | 1.81×10 <sup>-5</sup> | 3.67×10 <sup>-5</sup> | 2.10×10 <sup>-4</sup> | 1.17×10 <sup>-5</sup> | 4.48×10 <sup>-6</sup> |
|       | 1000  | 3.11×10 <sup>-4</sup> | 2.23×10 <sup>-5</sup> | 1.87×10 <sup>-8</sup> | 4.68×10 <sup>-5</sup> | 8.07×10 <sup>-5</sup> | 4.41×10 <sup>-5</sup> | 3.06×10 <sup>-5</sup> | 1.42×10 <sup>-5</sup> |
| Aug   | 0     | 2.48×10 <sup>-4</sup> | 3.28×10 <sup>-7</sup> | 1.46×10 <sup>-7</sup> | 5.53×10 <sup>-6</sup> | 7.47×10 <sup>-5</sup> | 4.37×10 <sup>-6</sup> | 3.04×10 <sup>-6</sup> | 1.12×10 <sup>-6</sup> |
|       | 150   | 3.54×10 <sup>-4</sup> | 5.06×10 <sup>-4</sup> | 6.21×10 <sup>-8</sup> | 1.49×10 <sup>-5</sup> | 2.39×10 <sup>-5</sup> | 6.14×10 <sup>-4</sup> | 3.88×10 <sup>-5</sup> | 7.35×10 <sup>-6</sup> |
|       | 300   | 3.21×10 <sup>-4</sup> | 3.80×10 <sup>-4</sup> | 1.83×10 <sup>-7</sup> | 1.18×10 <sup>-5</sup> | 3.66×10 <sup>-5</sup> | 4.75×10 <sup>-4</sup> | 4.25×10 <sup>-5</sup> | 1.22×10 <sup>-5</sup> |
|       | 750   | 3.46×10 <sup>-4</sup> | 9.32×10 <sup>-5</sup> | 2.12×10 <sup>-7</sup> | 1.67×10 <sup>-5</sup> | 5.10×10 <sup>-5</sup> | 1.33×10 <sup>-4</sup> | 2.63×10 <sup>-5</sup> | 1.13×10 <sup>-5</sup> |
|       | 1000  | 4.52×10 <sup>-4</sup> | 4.08×10 <sup>-5</sup> | 5.32×10 <sup>-8</sup> | 2.67×10 <sup>-5</sup> | 7.44×10 <sup>-5</sup> | 8.78×10 <sup>-5</sup> | 4.09×10 <sup>-5</sup> | 1.92×10 <sup>-5</sup> |
| Oct   | 0     | 3.09×10 <sup>-5</sup> | 3.48×10 <sup>-6</sup> | 1.58×10 <sup>-8</sup> | 1.76×10 <sup>-6</sup> | 8.89×10 <sup>-6</sup> | 4.37×10 <sup>-7</sup> | 1.70×10 <sup>-6</sup> | 8.51×10 <sup>-7</sup> |
|       | 150   | 3.60×10 <sup>-4</sup> | 5.04×10 <sup>-4</sup> | 1.52×10 <sup>-8</sup> | 1.57×10 <sup>-5</sup> | 3.22×10 <sup>-5</sup> | 6.57×10 <sup>-6</sup> | 2.65×10 <sup>-5</sup> | 8.21×10 <sup>-6</sup> |
|       | 300   | 3.11×10 <sup>-4</sup> | 4.00×10 <sup>-4</sup> | 4.98×10 <sup>-8</sup> | 1.26×10 <sup>-5</sup> | 3.31×10 <sup>-5</sup> | 7.38×10 <sup>-6</sup> | 2.40×10 <sup>-5</sup> | 9.06×10 <sup>-6</sup> |
|       | 750   | 2.90×10 <sup>-4</sup> | 9.05×10 <sup>-5</sup> | 9.29×10 <sup>-8</sup> | 1.37×10 <sup>-5</sup> | 5.20×10 <sup>-5</sup> | 1.14×10 <sup>-5</sup> | 3.34×10 <sup>-5</sup> | 1.60×10 <sup>-5</sup> |
|       | 1000  | 1.47×10 <sup>-4</sup> | 6.05×10 <sup>-5</sup> | 2.77×10 <sup>-7</sup> | 1.79×10 <sup>-5</sup> | 4.33×10 <sup>-5</sup> | 4.41×10 <sup>-6</sup> | 1.91×10 <sup>-5</sup> | 8.48×10 <sup>-6</sup> |

73 **Table S2. Class and phylum-level classification of 42 bacterial orders identified during**  
74 **bimonthly surveys in the East/Japan Sea in 2021.**

| Phylum                  | Class                  | Order                      |
|-------------------------|------------------------|----------------------------|
| Proteobacteria          | Gammaproteobacteria    | <i>Xanthomonadales</i>     |
|                         |                        | <i>Thiotrichales</i>       |
|                         |                        | <i>Nevskiales</i>          |
|                         |                        | <i>Cellvibrionales</i>     |
|                         |                        | <i>Vibrionales</i>         |
|                         |                        | <i>Enterobacterales</i>    |
|                         |                        | <i>Oceanospirillales</i>   |
|                         |                        | <i>Alteromonadales</i>     |
|                         |                        | <i>Pseudomonadales</i>     |
|                         |                        | <i>unclassified</i>        |
|                         |                        | <i>Salinisphaerales</i>    |
|                         | Alphaproteobacteria    | <i>Pelagibacterales</i>    |
|                         |                        | <i>Maricaulales</i>        |
|                         |                        | <i>Rhizobiales</i>         |
|                         |                        | <i>Rhodobacterales</i>     |
|                         |                        | <i>Caulobacterales</i>     |
|                         |                        | <i>Sphingomonadales</i>    |
|                         |                        | <i>Hyphomonadales</i>      |
|                         |                        | <i>Kordiimonadales</i>     |
| <i>Rhodospirillales</i> |                        |                            |
| Betaproteobacteria      | <i>Burkholderiales</i> |                            |
| Deltaproteobacteria     | <i>Myxococcales</i>    |                            |
| Bacteroidetes           | Saprospira             | <i>Saprospirales</i>       |
|                         | Cytophagia             | <i>Cytophagales</i>        |
|                         | Flavobacteriia         | <i>Flavobacteriales</i>    |
|                         | Bacteroidia            | <i>Bacteroidales</i>       |
|                         | Sphingobacteriia       | <i>Sphingobacteriales</i>  |
|                         | Chitinophagia          | <i>Chitinophagales</i>     |
| Actinobacteria          | Actinomycetia          | <i>Corynebacteriales</i>   |
|                         |                        | <i>Propionibacteriales</i> |
|                         |                        | <i>Micrococcales</i>       |
|                         |                        | <i>Geodermatophilales</i>  |
| Balneolaeota            | Balneolia              | <i>Balneolales</i>         |
| Cyanobacteria           | unclassified           | <i>Synechococcales</i>     |
| Fusobacteria            | Fusobacteriia          | <i>Fusobacteriales</i>     |
| Firmicutes              | Bacilli                | <i>Bacillales</i>          |
|                         |                        | <i>Lactobacillales</i>     |
| Planctomycetes          | Planctomycetia         | <i>Pirellulales</i>        |
|                         |                        | <i>Planctomycetales</i>    |
| Verrucomicrobia         | Verrucomicrobiae       | <i>Verrucomicrobiales</i>  |
| Lentisphaerae           | Lentisphaeria          | <i>Lentisphaerales</i>     |
| Thaumarchaeota          | unclassified           | <i>Nitrosopumilales</i>    |

75 **Table S3. Bacterial community composition (%) by depth and sampling month.** Bacterial  
76 community composition (%) is presented for five depths (0, 150, 300, 750 and 1000 m) across  
77 five sampling months (February, April, June, August and October). A total of 42 bacterial orders  
78 were identified, and relative abundance values at each depth are denoted by labels **a–e**,  
79 respectively.

80 **a**

| Order                      | Feb (0m) | Apr (0m) | Jun (0m) | Aug (0m) | Oct (0m) |
|----------------------------|----------|----------|----------|----------|----------|
| <i>Oceanospirillales</i>   | 0.318    | 0.065    | 0.039    | 0.231    | 0.186    |
| <i>Pelagibacterales</i>    | 67.537   | 75.064   | 86.269   | 58.607   | 93.267   |
| <i>Flavobacteriales</i>    | 2.212    | 8.025    | 1.363    | 1.283    | 1.792    |
| <i>Maricaulales</i>        | 0.032    | 0.173    | 0.019    | 0.007    | 0.000    |
| <i>Rhizobiales</i>         | 0.030    | 0.022    | 0.014    | 0.076    | 0.049    |
| <i>Rhodobacterales</i>     | 14.198   | 14.364   | 11.696   | 5.426    | 1.198    |
| <i>Alteromonadales</i>     | 1.475    | 0.232    | 0.235    | 2.151    | 0.571    |
| <i>Pseudomonadales</i>     | 0.000    | 0.032    | 0.006    | 0.000    | 0.000    |
| <i>Nitrosopumilales</i>    | 12.477   | 1.245    | 0.008    | 0.014    | 0.145    |
| <i>Caulobacteriales</i>    | 0.005    | 0.000    | 0.002    | 0.000    | 0.000    |
| <i>Corynebacteriales</i>   | 0.005    | 0.078    | 0.006    | 0.007    | 0.000    |
| <i>Balneolales</i>         | 0.000    | 0.000    | 0.002    | 0.000    | 0.003    |
| <i>Micrococcales</i>       | 0.002    | 0.000    | 0.000    | 0.000    | 0.005    |
| <i>unclassified</i>        | 0.037    | 0.013    | 0.008    | 0.000    | 0.000    |
| <i>Synechococcales</i>     | 0.005    | 0.002    | 0.044    | 30.596   | 2.244    |
| <i>Burkholderiales</i>     | 0.016    | 0.004    | 0.000    | 0.000    | 0.000    |
| <i>Geodermatophilales</i>  | 0.002    | 0.000    | 0.002    | 0.007    | 0.015    |
| <i>Salinisphaerales</i>    | 0.000    | 0.000    | 0.052    | 0.003    | 0.000    |
| <i>Fusobacteriales</i>     | 0.021    | 0.015    | 0.009    | 0.007    | 0.010    |
| <i>Bacillales</i>          | 0.014    | 0.000    | 0.003    | 0.000    | 0.000    |
| <i>Thiotrichales</i>       | 0.103    | 0.002    | 0.002    | 0.000    | 0.000    |
| <i>Hyphomonadales</i>      | 0.011    | 0.420    | 0.038    | 0.083    | 0.101    |
| <i>Sphingomonadales</i>    | 0.018    | 0.006    | 0.013    | 0.169    | 0.080    |
| <i>Pirellulales</i>        | 0.082    | 0.019    | 0.008    | 0.000    | 0.124    |
| <i>Vibrionales</i>         | 0.005    | 0.011    | 0.022    | 1.074    | 0.072    |
| <i>Propionibacteriales</i> | 0.014    | 0.067    | 0.017    | 0.014    | 0.013    |
| <i>Verrucomicrobiales</i>  | 0.385    | 0.102    | 0.038    | 0.014    | 0.000    |
| <i>Cytophagales</i>        | 0.000    | 0.000    | 0.023    | 0.114    | 0.005    |
| <i>Cellvibrionales</i>     | 0.000    | 0.000    | 0.000    | 0.003    | 0.000    |
| <i>Kordiimonadales</i>     | 0.005    | 0.006    | 0.000    | 0.007    | 0.010    |
| <i>Rhodospirillales</i>    | 0.018    | 0.013    | 0.008    | 0.041    | 0.065    |
| <i>Lentisphaerales</i>     | 0.962    | 0.009    | 0.055    | 0.062    | 0.018    |
| <i>Lactobacillales</i>     | 0.005    | 0.002    | 0.002    | 0.007    | 0.003    |
| <i>Bacteroidales</i>       | 0.005    | 0.006    | 0.000    | 0.000    | 0.023    |
| <i>Sphingobacteriales</i>  | 0.005    | 0.000    | 0.000    | 0.000    | 0.000    |

81

| Order                      | Feb (150m) | Apr (150m) | Jun (150m) | Aug (150m) | Oct (150m) |
|----------------------------|------------|------------|------------|------------|------------|
| <i>Oceanospirillales</i>   | 0.662      | 0.128      | 0.290      | 0.662      | 1.340      |
| <i>Pelagibacterales</i>    | 45.304     | 63.973     | 63.677     | 52.732     | 52.303     |
| <i>Flavobacteriales</i>    | 1.294      | 1.038      | 0.856      | 2.337      | 1.421      |
| <i>Maricaulales</i>        | 0.042      | 0.013      | 0.026      | 0.000      | 0.003      |
| <i>Rhizobiales</i>         | 0.279      | 0.088      | 0.120      | 0.305      | 0.492      |
| <i>Rhodobacterales</i>     | 8.594      | 11.386     | 9.346      | 12.366     | 8.150      |
| <i>Alteromonadales</i>     | 12.843     | 0.807      | 1.144      | 4.918      | 2.686      |
| <i>Chitinophagales</i>     | 0.000      | 0.002      | 0.000      | 0.000      | 0.000      |
| <i>Pseudomonadales</i>     | 0.058      | 0.002      | 0.041      | 0.006      | 0.000      |
| <i>Nitrosopumilales</i>    | 25.235     | 20.374     | 22.712     | 23.959     | 30.663     |
| <i>Caulobacterales</i>     | 0.053      | 0.025      | 0.000      | 0.017      | 0.010      |
| <i>Corynebacteriales</i>   | 0.132      | 0.065      | 0.054      | 0.026      | 0.201      |
| <i>Balneolales</i>         | 0.005      | 0.000      | 0.002      | 0.000      | 0.010      |
| <i>Micrococcales</i>       | 0.000      | 0.000      | 0.004      | 0.009      | 0.010      |
| <i>unclassified</i>        | 0.013      | 0.061      | 0.021      | 0.023      | 0.019      |
| <i>Synechococcales</i>     | 0.003      | 0.002      | 0.002      | 0.081      | 0.013      |
| <i>Burkholderiales</i>     | 0.061      | 0.055      | 0.054      | 0.046      | 0.000      |
| <i>Geodermatophilales</i>  | 0.000      | 0.000      | 0.079      | 0.000      | 0.026      |
| <i>Salinisphaerales</i>    | 0.000      | 0.000      | 0.006      | 0.009      | 0.003      |
| <i>Fusobacteriales</i>     | 0.003      | 0.010      | 0.036      | 0.015      | 0.019      |
| <i>Bacillales</i>          | 0.074      | 0.036      | 0.051      | 0.105      | 0.016      |
| <i>Thiotrichales</i>       | 1.218      | 0.000      | 0.000      | 0.026      | 0.006      |
| <i>Hyphomonadales</i>      | 0.324      | 0.648      | 0.272      | 0.636      | 0.450      |
| <i>Sphingomonadales</i>    | 0.058      | 0.034      | 0.103      | 0.221      | 0.317      |
| <i>Enterobacterales</i>    | 0.003      | 0.000      | 0.002      | 0.009      | 0.000      |
| <i>Pirellulales</i>        | 0.211      | 0.153      | 0.079      | 0.218      | 0.395      |
| <i>Vibrionales</i>         | 0.235      | 0.078      | 0.103      | 0.139      | 0.223      |
| <i>Propionibacteriales</i> | 0.224      | 0.080      | 0.144      | 0.253      | 0.236      |
| <i>Verrucomicrobiales</i>  | 1.885      | 0.614      | 0.182      | 0.017      | 0.013      |
| <i>Cytophagales</i>        | 0.013      | 0.002      | 0.051      | 0.017      | 0.003      |
| <i>Cellvibrionales</i>     | 0.018      | 0.004      | 0.006      | 0.070      | 0.016      |
| <i>Saprospirales</i>       | 0.029      | 0.000      | 0.000      | 0.000      | 0.000      |
| <i>Kordiimonadales</i>     | 0.026      | 0.015      | 0.011      | 0.000      | 0.074      |
| <i>Rhodospirillales</i>    | 0.214      | 0.023      | 0.051      | 0.235      | 0.809      |
| <i>Lentisphaerales</i>     | 0.849      | 0.275      | 0.463      | 0.537      | 0.045      |
| <i>Lactobacillales</i>     | 0.011      | 0.008      | 0.004      | 0.000      | 0.023      |
| <i>Bacteroidales</i>       | 0.016      | 0.002      | 0.002      | 0.006      | 0.003      |
| <i>Xanthomonadales</i>     | 0.003      | 0.000      | 0.002      | 0.000      | 0.000      |
| <i>Sphingobacteriales</i>  | 0.011      | 0.000      | 0.000      | 0.000      | 0.000      |

| Order                      | Feb (300m) | Apr (300m) | Jun (300m) | Aug (300m) | Oct (300m) |
|----------------------------|------------|------------|------------|------------|------------|
| <i>Oceanospirillales</i>   | 0.637      | 0.182      | 0.688      | 0.983      | 1.888      |
| <i>Pelagibacterales</i>    | 46.886     | 49.597     | 49.239     | 43.153     | 52.195     |
| <i>Flavobacteriales</i>    | 4.928      | 3.550      | 3.828      | 9.556      | 1.968      |
| <i>Maricaulales</i>        | 0.086      | 0.000      | 0.000      | 0.032      | 0.018      |
| <i>Rhizobiales</i>         | 0.763      | 0.273      | 2.878      | 0.444      | 0.618      |
| <i>Rhodobacterales</i>     | 6.732      | 5.599      | 7.736      | 7.027      | 5.500      |
| <i>Alteromonadales</i>     | 9.091      | 2.441      | 1.601      | 7.007      | 2.932      |
| <i>Chitinophagales</i>     | 0.000      | 0.005      | 0.514      | 0.000      | 0.000      |
| <i>Pseudomonadales</i>     | 0.199      | 0.051      | 0.282      | 0.011      | 0.004      |
| <i>Nitrosopumilales</i>    | 20.457     | 28.856     | 24.814     | 27.504     | 31.709     |
| <i>Caulobacterales</i>     | 0.184      | 0.008      | 2.146      | 0.000      | 0.004      |
| <i>Corynebacteriales</i>   | 0.128      | 0.230      | 0.146      | 0.080      | 0.133      |
| <i>Balneolales</i>         | 0.000      | 0.000      | 0.000      | 0.000      | 0.004      |
| <i>Micrococcales</i>       | 0.031      | 0.003      | 0.600      | 0.000      | 0.000      |
| <i>unclassified</i>        | 0.015      | 0.011      | 0.022      | 0.011      | 0.031      |
| <i>Synechococcales</i>     | 0.002      | 0.008      | 0.000      | 0.550      | 0.000      |
| <i>Burkholderiales</i>     | 0.325      | 0.080      | 0.097      | 0.109      | 0.018      |
| <i>Geodermatophilales</i>  | 0.144      | 0.000      | 0.029      | 0.000      | 0.013      |
| <i>Salinisphaerales</i>    | 0.000      | 0.000      | 0.042      | 0.000      | 0.000      |
| <i>Fusobacteriales</i>     | 0.095      | 0.003      | 0.011      | 0.037      | 0.004      |
| <i>Bacillales</i>          | 2.237      | 0.046      | 0.077      | 0.209      | 0.049      |
| <i>Thiotrichales</i>       | 1.603      | 0.000      | 0.044      | 0.040      | 0.036      |
| <i>Hyphomonadales</i>      | 0.745      | 1.380      | 0.137      | 0.803      | 0.564      |
| <i>Sphingomonadales</i>    | 0.489      | 0.059      | 1.171      | 0.209      | 0.280      |
| <i>Enterobacterales</i>    | 0.042      | 0.013      | 0.000      | 0.003      | 0.000      |
| <i>Pirellulales</i>        | 0.102      | 0.311      | 0.262      | 0.333      | 0.333      |
| <i>Vibrionales</i>         | 0.097      | 0.091      | 0.079      | 0.198      | 0.142      |
| <i>Propionibacteriales</i> | 0.694      | 0.319      | 0.452      | 0.232      | 0.173      |
| <i>Verrucomicrobiales</i>  | 0.780      | 5.599      | 0.505      | 0.361      | 0.120      |
| <i>Cytophagales</i>        | 0.000      | 0.000      | 0.013      | 0.092      | 0.004      |
| <i>Cellvibrionales</i>     | 0.027      | 0.008      | 0.004      | 0.000      | 0.000      |
| <i>Saprospirales</i>       | 0.188      | 0.000      | 0.000      | 0.000      | 0.076      |
| <i>Kordiimonadales</i>     | 0.471      | 0.005      | 0.864      | 0.000      | 1.137      |
| <i>Rhodospirillales</i>    | 1.114      | 0.021      | 0.697      | 0.327      | 0.018      |
| <i>Lentisphaerales</i>     | 0.004      | 1.248      | 0.000      | 0.674      | 0.018      |
| <i>Lactobacillales</i>     | 0.049      | 0.000      | 0.000      | 0.003      | 0.000      |
| <i>Myxococcales</i>        | 0.102      | 0.000      | 0.002      | 0.000      | 0.000      |
| <i>Bacteroidales</i>       | 0.000      | 0.003      | 1.019      | 0.009      | 0.000      |
| <i>Nevskiales</i>          | 0.013      | 0.000      | 0.000      | 0.000      | 0.000      |
| <i>Xanthomonadales</i>     | 0.539      | 0.000      | 0.000      | 0.000      | 0.000      |
| <i>Planctomycetales</i>    | 0.000      | 0.000      | 0.000      | 0.000      | 0.009      |
| <i>Sphingobacteriales</i>  | 0.000      | 0.000      | 0.000      | 0.000      | 0.009      |

| Order                      | Feb (750m) | Apr (750m) | Jun (750m) | Aug (750m) | Oct (750m) |
|----------------------------|------------|------------|------------|------------|------------|
| <i>Oceanospirillales</i>   | 1.526      | 1.811      | 2.290      | 2.454      | 3.361      |
| <i>Pelagibacterales</i>    | 68.162     | 58.310     | 65.389     | 44.747     | 65.707     |
| <i>Flavobacteriales</i>    | 1.206      | 5.526      | 2.488      | 4.483      | 2.145      |
| <i>Maricaulales</i>        | 0.223      | 0.000      | 0.048      | 0.069      | 0.024      |
| <i>Rhizobiales</i>         | 1.500      | 2.812      | 0.718      | 1.299      | 1.007      |
| <i>Rhodobacterales</i>     | 1.459      | 2.175      | 3.100      | 2.842      | 1.503      |
| <i>Alteromonadales</i>     | 7.007      | 6.003      | 2.599      | 28.745     | 9.364      |
| <i>Chitinophagales</i>     | 0.000      | 0.640      | 0.000      | 0.000      | 0.000      |
| <i>Pseudomonadales</i>     | 0.208      | 0.804      | 0.945      | 0.023      | 0.019      |
| <i>Nitrosopumilales</i>    | 5.889      | 8.110      | 14.083     | 6.782      | 8.264      |
| <i>Caulobacterales</i>     | 0.602      | 0.372      | 0.376      | 0.240      | 0.073      |
| <i>Corynebacteriales</i>   | 0.220      | 0.288      | 0.096      | 0.178      | 0.341      |
| <i>Balneolales</i>         | 0.191      | 0.000      | 0.005      | 0.000      | 0.141      |
| <i>Micrococcales</i>       | 0.000      | 0.155      | 0.010      | 0.007      | 0.005      |
| <i>unclassified</i>        | 0.276      | 0.073      | 0.092      | 0.112      | 0.277      |
| <i>Synechococcales</i>     | 0.003      | 0.003      | 0.024      | 0.760      | 0.024      |
| <i>Burkholderiales</i>     | 0.537      | 0.220      | 0.010      | 0.187      | 0.156      |
| <i>Geodermatophilales</i>  | 0.000      | 0.000      | 0.053      | 0.030      | 0.010      |
| <i>Salinisphaerales</i>    | 0.000      | 0.000      | 0.010      | 0.039      | 0.000      |
| <i>Fusobacteriales</i>     | 0.038      | 0.017      | 0.101      | 0.026      | 0.010      |
| <i>Bacillales</i>          | 0.660      | 0.652      | 0.000      | 0.164      | 0.078      |
| <i>Thiotrichales</i>       | 1.741      | 0.068      | 0.000      | 0.007      | 0.049      |
| <i>Hyphomonadales</i>      | 2.498      | 8.212      | 1.046      | 0.905      | 1.445      |
| <i>Sphingomonadales</i>    | 0.572      | 0.680      | 1.162      | 0.651      | 0.336      |
| <i>Enterobacterales</i>    | 0.141      | 0.116      | 0.000      | 0.010      | 0.019      |
| <i>Pirellulales</i>        | 0.000      | 0.118      | 0.391      | 0.599      | 0.204      |
| <i>Vibrionales</i>         | 0.346      | 0.319      | 0.318      | 0.191      | 0.491      |
| <i>Propionibacteriales</i> | 1.723      | 0.739      | 0.241      | 0.191      | 0.540      |
| <i>Verrucomicrobiales</i>  | 0.713      | 0.260      | 3.442      | 1.789      | 0.978      |
| <i>Cytophagales</i>        | 0.200      | 0.093      | 0.039      | 0.095      | 0.000      |
| <i>Cellvibrionales</i>     | 0.029      | 0.000      | 0.024      | 0.020      | 0.024      |
| <i>Saprospirales</i>       | 0.144      | 0.000      | 0.000      | 0.000      | 0.000      |
| <i>Kordiimonadales</i>     | 0.402      | 0.214      | 0.024      | 0.043      | 0.233      |
| <i>Rhodospirillales</i>    | 1.383      | 0.310      | 0.159      | 0.862      | 2.617      |
| <i>Lentisphaerales</i>     | 0.000      | 0.700      | 0.627      | 1.414      | 0.472      |
| <i>Lactobacillales</i>     | 0.194      | 0.003      | 0.063      | 0.010      | 0.034      |
| <i>Myxococcales</i>        | 0.000      | 0.090      | 0.000      | 0.000      | 0.000      |
| <i>Bacteroidales</i>       | 0.205      | 0.000      | 0.029      | 0.003      | 0.010      |
| <i>Nevskiales</i>          | 0.000      | 0.000      | 0.000      | 0.000      | 0.039      |
| <i>Xanthomonadales</i>     | 0.000      | 0.000      | 0.000      | 0.007      | 0.000      |
| <i>Planctomycetales</i>    | 0.000      | 0.000      | 0.000      | 0.000      | 0.000      |
| <i>Sphingobacteriales</i>  | 0.000      | 0.107      | 0.000      | 0.016      | 0.000      |

| Order                      | Feb (1000m) | Apr (1000m) | Jun (1000m) | Aug (1000m) | Oct (1000m) |
|----------------------------|-------------|-------------|-------------|-------------|-------------|
| <i>Oceanospirillales</i>   | 1.894       | 0.390       | 2.257       | 3.650       | 2.370       |
| <i>Pelagibacterales</i>    | 68.690      | 60.112      | 52.751      | 30.453      | 74.110      |
| <i>Flavobacteriales</i>    | 1.634       | 4.596       | 3.407       | 4.191       | 3.280       |
| <i>Maricaulales</i>        | 0.000       | 0.000       | 0.143       | 0.226       | 0.000       |
| <i>Rhizobiales</i>         | 0.720       | 0.744       | 1.333       | 1.177       | 0.936       |
| <i>Rhodobacterales</i>     | 1.809       | 2.675       | 4.404       | 1.185       | 1.017       |
| <i>Alteromonadales</i>     | 7.211       | 7.136       | 18.795      | 44.891      | 4.887       |
| <i>Chitinophagales</i>     | 0.000       | 0.000       | 0.010       | 0.132       | 0.000       |
| <i>Pseudomonadales</i>     | 0.109       | 0.394       | 0.670       | 0.144       | 0.046       |
| <i>Nitrosopumilales</i>    | 3.563       | 5.121       | 2.105       | 2.358       | 4.938       |
| <i>Caulobacterales</i>     | 0.035       | 0.040       | 0.194       | 0.409       | 0.025       |
| <i>Corynebacteriales</i>   | 0.113       | 0.784       | 0.140       | 0.093       | 0.178       |
| <i>Balneolales</i>         | 0.000       | 0.000       | 0.098       | 0.000       | 0.000       |
| <i>Micrococcales</i>       | 0.957       | 0.033       | 0.441       | 0.165       | 1.088       |
| <i>unclassified</i>        | 0.012       | 0.652       | 0.006       | 0.496       | 0.010       |
| <i>Synechococcales</i>     | 0.311       | 0.004       | 1.019       | 0.459       | 0.122       |
| <i>Burkholderiales</i>     | 0.070       | 2.486       | 0.130       | 0.953       | 0.137       |
| <i>Geodermatophilales</i>  | 0.000       | 0.029       | 4.845       | 0.000       | 0.203       |
| <i>Salinisphaerales</i>    | 0.016       | 0.000       | 0.010       | 0.368       | 0.010       |
| <i>Fusobacteriales</i>     | 0.825       | 0.098       | 0.873       | 0.502       | 0.163       |
| <i>Bacillales</i>          | 6.250       | 1.057       | 1.486       | 1.307       | 0.010       |
| <i>Thiotrichales</i>       | 1.241       | 0.095       | 0.203       | 0.002       | 1.312       |
| <i>Hyphomonadales</i>      | 0.420       | 3.568       | 1.448       | 0.236       | 0.870       |
| <i>Sphingomonadales</i>    | 0.047       | 0.973       | 0.086       | 1.990       | 0.025       |
| <i>Enterobacterales</i>    | 0.148       | 0.036       | 0.000       | 0.195       | 0.356       |
| <i>Pirellulales</i>        | 0.039       | 0.160       | 0.251       | 0.116       | 0.483       |
| <i>Vibrionales</i>         | 0.432       | 0.230       | 0.797       | 0.280       | 0.285       |
| <i>Propionibacteriales</i> | 1.462       | 1.225       | 1.718       | 0.791       | 1.449       |
| <i>Verrucomicrobiales</i>  | 0.062       | 6.801       | 0.000       | 1.750       | 0.031       |
| <i>Cytophagales</i>        | 0.027       | 0.000       | 0.000       | 0.230       | 0.137       |
| <i>Cellvibrionales</i>     | 0.000       | 0.047       | 0.003       | 0.083       | 0.005       |
| <i>Saprospirales</i>       | 0.296       | 0.000       | 0.000       | 0.000       | 0.041       |
| <i>Kordiimonadales</i>     | 1.342       | 0.000       | 0.000       | 0.154       | 0.748       |
| <i>Rhodospirillales</i>    | 0.202       | 0.102       | 0.308       | 0.595       | 0.488       |
| <i>Lentisphaerales</i>     | 0.004       | 0.168       | 0.013       | 0.000       | 0.173       |
| <i>Lactobacillales</i>     | 0.004       | 0.098       | 0.006       | 0.183       | 0.015       |
| <i>Myxococcales</i>        | 0.000       | 0.000       | 0.051       | 0.000       | 0.005       |
| <i>Bacteroidales</i>       | 0.058       | 0.055       | 0.000       | 0.000       | 0.046       |
| <i>Nevskiales</i>          | 0.000       | 0.000       | 0.000       | 0.000       | 0.000       |
| <i>Xanthomonadales</i>     | 0.000       | 0.000       | 0.051       | 0.110       | 0.005       |
| <i>Planctomycetales</i>    | 0.000       | 0.000       | 0.000       | 0.000       | 0.000       |
| <i>Sphingobacteriales</i>  | 0.058       | 0.091       | 0.000       | 0.128       | 0.046       |
